# Supplementary material for: A Novel Biclustering Algorithm for the Discovery of Meaningful Biological Correlations between microRNAs and their Target Genes
Source: PubMed Central journal article supplement (PMC3633049; doi:10.1186/1471-2105-14-s7-s8), 2013-04-22
Supplement: 1471-2105-14-S7-S8-S1.pdf [file 1471-2105-14-S7-S8-S1.pdf]

## Supplementary File 1 - Reactome results on bicluster 6-72-22-70

False discovery rate Un-adjusted probability of seeing N or more genes in this Event by chance  
Number of genes in your query which map to this Event Total number of genes involved in this Event  
Identifier of this Event Name of this Event Submitted identifiers mapping to this Event

-1.51182628499782e-13 8 38 REACT\_821 Cyclin D associated events in G1 E2F1, E2F3, RB1, CDKN1A, RBL2, CCND2, RBL1, CCND1  
-1.51182628499782e-13 8 38 REACT\_1590 G1 Phase E2F1, E2F3, RB1, CDKN1A, RBL2, CCND2, RBL1, CCND1  
-5.64696440441308e-13 6 12 REACT\_1882 Cyclin D:Cdk4/6 mediated phosphorylation of Rb and dissociation of phospho-Rb from the E2F1/2/3:DP-1 complexes E2F1, E2F3, RB1, CDKN1A, CCND2, CCND1  
-1.47930576111424e-10 9 133 REACT\_21267 Mitotic G1-G1/S phases E2F1, E2F3, RB1, CDKN1A, RBL2, CCND2, WEE1, RBL1, CCND1  
-2.9423735496367e-08 4 11 REACT\_111248 Cyclin D:CDK4/6 mediated phosphorylation of p107 (RBL1) and dissociation of phosphorylated p107 (p-RBL1) from DP1:E2F4 complex CDKN1A, CCND2, RBL1, CCND1  
-4.40404344496045e-08 4 12 REACT\_111206 Cyclin D:Cdk4/6 mediated phosphorylation of p130 (RBL2) and dissociation of phosphorylated p130 (RBL2) from DP1:E2F4/5 complex CDKN1A, RBL2, CCND2, CCND1  
-5.12949722586043e-07 9 336 REACT\_152 Cell Cycle, Mitotic E2F1, E2F3, RB1, CDKN1A, RBL2, CCND2, WEE1, RBL1, CCND1  
-1.10115755016645e-06 3 7 REACT\_2081 Formation of Cyclin D:Cdk4/6 complexes CDKN1A, CCND2, CCND1  
-1.10115755016645e-06 3 7 REACT\_713 Translocation of Cyclin D:Cdk4/6 complexes from the cytoplasm to the nucleus CDKN1A, CCND2, CCND1  
-2.9194067388945e-06 9 413 REACT\_115566 Cell Cycle E2F1, E2F3, RB1, CDKN1A, RBL2, CCND2, WEE1, RBL1, CCND1  
-3.75121916187681e-06 3 10 REACT\_96 Phosphorylation of Cyclin D:Cdk4/6 complexes CDKN1A, CCND2, CCND1  
-3.15569649124271e-05 2 3 REACT\_1277 Replication initiation regulation by Rb1/E2F1 E2F1, RB1  
-6.96257848609192e-05 3 25 REACT\_111214 G0 and Early G1 E2F1, RBL2, RBL1  
-7.6097762257074e-05 4 71 REACT\_6844 Signaling by TGF-beta Receptor Complex TGFBR2, SMAD4, MYC, RBL1  
-0.000104768142163583 2 5 REACT\_1915 G2 Phase E2F1, E2F3  
-0.000104768142163583 2 5 REACT\_9021 Association of Cyclin A:phospho-Cdk2(Thr 160) with E2F1/E2F3 E2F1, E2F3  
-0.000104768142163583 2 5 REACT\_9023 Phosphorylation of E2F1/E2F3 by Cyclin A:phospho-Cdk2(Thr 160) E2F1, E2F3  
-0.000134336329969611 3 31 REACT\_120734 SMAD2/SMAD3:SMAD4 heterotrimer regulates transcription SMAD4, MYC, RBL1  
-0.000156836922282904 2 6 REACT\_111167 Transcription of E2F targets under negative control by DREAM complex E2F1, RBL1  
-0.000219131228175128 2 7 REACT\_9007 Phosphorylation of proteins involved in the G1/S transition by Cyclin A:Cdk2 RB1, CDKN1A  
-0.000291588943261686 2 8 REACT\_121097 SMAD2/3:SMAD4 heterotrimer forms a complex with RBL1, E2F4/5 and DP1/2 SMAD4, RBL1  
-0.000373868722333886 4 107 REACT\_1783 G1/S Transition E2F1, RB1, CDKN1A, WEE1  
-0.000415537985951919 4 110 REACT\_899 S Phase RB1, CDKN1A, WEE1, CCND1  
-0.000439331437829174 3 46 REACT\_121061 Transcriptional activity of SMAD2/SMAD3:SMAD4 heterotrimer SMAD4, MYC, RBL1  
-0.000468282650687512 3 47 REACT\_21351 Exocytosis of platelet alpha granule contents THBS1, APP, VEGFA  
-0.000681820878771477 2 12 REACT\_329 Inhibition of replication initiation of damaged DNA by RB1/E2F1 E2F1, RB1  
-0.0011082415994404 3 63 REACT\_1574 Cyclin E associated events during G1/S transition RB1, CDKN1A, WEE1  
-0.00116026061961749 3 64 REACT\_9029 Cyclin A:Cdk2-associated events at S phase entry RB1, CDKN1A, WEE1  
-0.00205607129193984 3 78 REACT\_318 Platelet degranulation THBS1, APP, VEGFA  
-0.00213062767979125 2 21 REACT\_75900 Inflammasomes APP, BCL2  
-0.00233899850756423 2 22 REACT\_2111 Orc1 is phosphorylated by cyclin A/CDK2 RB1, CDKN1A  
-0.00245681819007056 3 83 REACT\_1280 Response to elevated platelet cytosolic Ca2+ THBS1, APP, VEGFA  
-0.00255663246913833 2 23 REACT\_12034 Signaling by BMP BMPR2, SMAD4  
-0.00350091729171047 3 94 REACT\_21391 Mitotic G2-G2/M phases E2F1, E2F3, WEE1  
-0.00378172938001817 2 28 REACT\_75829 PIP3 activates AKT signaling PTEN, CDKN1A  
-0.00378172938001817 2 28 REACT\_120850 TGF-beta receptor signaling activates SMADs TGFBR2, SMAD4  
-0.00522981652428562 2 33 REACT\_471 E2F mediated regulation of DNA replication E2F1, RB1  
-0.00654413201176741 2 37 REACT\_12464 PI3K/AKT activation PTEN, CDKN1A  
-0.00689389676434976 2 38 REACT\_115961 PI3K events in ERBB4 signaling PTEN, CDKN1A  
-0.0072520269467886 2 39 REACT\_12578 GAB1 signalosome PTEN, CDKN1A  
-0.00726319960551336 3 122 REACT\_16888 Signaling by PDGF THBS1, PTEN, CDKN1A  
-0.00916627608545078 2 44 REACT\_116008 PI3K events in ERBB2 signaling PTEN, CDKN1A  
-0.00970359739943947 11 1664 REACT\_111102 Signal Transduction THBS1, PTEN, TGFBR2, VEGFA, CDKN1A, RBL1, KAT2B, APP, BMPR2, SMAD4, MYC  
-0.010411788338289 2 47 REACT\_118780 NOTCH1 Intracellular Domain Regulates Transcription MYC, KAT2B  
-0.0140764282700432 2 55 REACT\_75913 Nucleotide-binding domain, leucine rich repeat containing receptor (NLR) signaling pathways APP, BCL2  
-0.0150683865673572 2 57 REACT\_21270 PI-3K cascade PTEN, CDKN1A  
-0.0222179697979647 2 70 REACT\_1156 Orc1 removal from chromatin RB1, CDKN1A  
-0.0222179697979647 2 70 REACT\_2148 Switching of origins to a post-replicative state RB1, CDKN1A

-0.0234217722263485 2 72 REACT\_207 Removal of licensing factors from origins RB1, CDKN1A  
-0.0234217722263485 2 72 REACT\_829 Regulation of DNA replication RB1, CDKN1A  
-0.0240336809318218 2 73 REACT\_118859 Signaling by NOTCH1 MYC, KAT2B  
-0.0271914480413554 2 78 REACT\_111040 Signaling by SCF-KIT PTEN, CDKN1A  
-0.0291616508914763 3 205 REACT\_798 Platelet activation, signaling and aggregation THBS1, APP, VEGFA  
-0.03169291268765 4 371 REACT\_12627 Generic Transcription Pathway SMAD4, MYC, RBL1, KAT2B  
-0.0375996331136461 2 93 REACT\_17025 Downstream signal transduction PTEN, CDKN1A  
-0.0375996331136461 2 93 REACT\_115596 Signaling by ERBB4 PTEN, CDKN1A  
-0.0398404653480469 2 96 REACT\_2014 Synthesis of DNA RB1, CDKN1A  
-0.0413624126593847 2 98 REACT\_118638 Downstream Signaling Events Of B Cell Receptor (BCR) PTEN, CDKN1A  
-0.0429064192730137 2 100 REACT\_21272 Downstream signaling of activated FGFR PTEN, CDKN1A  
-0.0444721560361185 2 102 REACT\_115755 Signaling by ERBB2 PTEN, CDKN1A  
-0.0492965010057483 2 108 REACT\_9417 Signaling by EGFR PTEN, CDKN1A
